# Supplementary material for: Metaprofiling of the Bacterial Community in Colonized Compost Extracts by Agaricus subrufescens
Source: MDPI journal article supplement (doi:10.3390/jof8100995), 2022-09-22
Supplement: s1 [file s1]

## Supplementary material

---

### Metaprofiling of the bacterial community in colonized compost extracts by *Agaricus subrufescens*

Matheus R. Iossi<sup>1</sup>, Isabela de Arruda Palú<sup>2</sup>, Douglas M. M. Soares<sup>3</sup>, Wagner Gonçalves Vieira Júnior<sup>1</sup>, Lucas da Silva Alves<sup>1</sup>, Cassius V. Stevani<sup>3</sup>, Cinthia E. C. Caitano<sup>1</sup>, Samir V. F. Atum<sup>3,4</sup>, Renato S. Freire<sup>3</sup>, Eustáquio S. Dias<sup>5</sup>, Diego C. Zied<sup>2\*</sup>

<sup>1</sup> Programa de Pós-Graduação em Microbiologia Agropecuária, Faculdade de Ciências Agrárias e Veterinárias (FCAV), Universidade Estadual Paulista (UNESP), Jaboticabal, São Paulo, Brazil

<sup>2</sup> Faculdade de Ciências Agrárias e Tecnológicas (FCAT), Universidade Estadual Paulista (UNESP), Dracena, São Paulo, Brazil

<sup>3</sup> Departamento de Química Fundamental, Instituto de Química, Universidade de São Paulo (USP), São Paulo, Brazil

<sup>4</sup> Departamento de Bioquímica, Instituto de Química, Universidade de São Paulo, São Paulo, Brazil

<sup>5</sup> Universidade Federal de Lavras (UFLA), Departamento de Biologia, Lavras, Minas Gerais, Brazil

\*Correspondence: [dczied@gmail.com](mailto:dczied@gmail.com) or [diego.zied@unesp.br](mailto:diego.zied@unesp.br) (D.C.Z.)

**Table S1.** Mineral analysis of the compost used in the experiment.

| Minerals                      | Concentration<br>(g/kg)* | Organic matter<br>(%) | pH  | Moisture<br>(%) | Carbon/Nitrogen<br>ratio |
|-------------------------------|--------------------------|-----------------------|-----|-----------------|--------------------------|
| N                             | 22.2                     | 71                    | 7.2 | 68              | 18:1                     |
| P <sub>2</sub> O <sub>5</sub> | 12.4                     |                       |     |                 |                          |
| K <sub>2</sub> O              | 34.7                     |                       |     |                 |                          |
| Ca                            | 32.9                     |                       |     |                 |                          |
| Mg                            | 6.9                      |                       |     |                 |                          |
| S                             | 13.0                     |                       |     |                 |                          |
| Na                            | 3.7                      |                       |     |                 |                          |
| B                             | 0.07                     |                       |     |                 |                          |
| Cu                            | 0.22                     |                       |     |                 |                          |
| Fe                            | 2.8                      |                       |     |                 |                          |
| Mn                            | 0.20                     |                       |     |                 |                          |
| Zn                            | 0.23                     |                       |     |                 |                          |

\* Mass of mineral per mass of soil.

**Table S2.** Abundance of bacteria present in the mushroom colonized compost extract (MCCE) obtained by immersion of the compost for 1h.

| Rank | Bacteria                               | Reads  | Rank | Bacteria                                                   | Reads |
|------|----------------------------------------|--------|------|------------------------------------------------------------|-------|
| 1    | <i>Serratia marcescens</i>             | 123477 | 48   | <i>Enterobacter cowanii</i>                                | 382   |
| 2    | <i>Bacillus flexus</i>                 | 7461   | 49   | <i>Paenibacillus alvei</i>                                 | 375   |
| 3    | <i>Salmonella enterica</i>             | 5697   | 50   | <i>Bacillus longiquaesitum</i>                             | 370   |
| 4    | <i>Morganella morganii</i>             | 3865   | 51   | <i>Pseudomonas nitroreducens</i>                           | 343   |
| 5    | <i>Plesiomonas shigelloides</i>        | 3763   | 52   | <i>Paenibacillus chondroitinus</i>                         | 334   |
| 6    | <i>Klebsiella oxytoca</i>              | 2976   | 53   | <i>Micrococcus luteus</i>                                  | 320   |
| 7    | <i>Paenibacillus amylolyticus</i>      | 2740   | 54   | <i>Bacillus coagulans</i>                                  | 299   |
| 8    | <i>Pseudomonas stutzeri</i>            | 2412   | 55   | <i>Geobacillus vulcani</i>                                 | 287   |
| 9    | <i>Bacillus firmus</i>                 | 2294   | 56   | <i>Paenibacillus stellifer</i>                             | 272   |
| 10   | <i>Trabulsiella farmeri</i>            | 2024   | 57   | <i>Photorhabdus temperata</i>                              | 271   |
| 11   | <i>Paenibacillus lentimorbus</i>       | 1820   | 58   | <i>Pseudomonas alcaligenes</i>                             | 268   |
| 12   | <i>Erwinia soli</i>                    | 1787   | 59   | <i>Serratia symbiotica</i>                                 | 262   |
| 13   | <i>Anoxybacillus kestanbolensis</i>    | 1711   | 60   | <i>Bacillus cohnii</i>                                     | 243   |
| 14   | <i>Actinomadura vinacea</i>            | 1671   | 61   | <i>Aneurinibacillus migulanus</i>                          | 241   |
| 15   | <i>Lysinibacillus boronitolerans</i>   | 1618   | 62   | <i>Paenibacillus barengoltzii</i>                          | 227   |
| 16   | <i>Bacillus halodurans</i>             | 1569   | 63   | <i>Staphylococcus sciuri</i>                               | 222   |
| 17   | <i>Bacillus muralis</i>                | 1480   | 64   | <i>Bacillus marisflavi</i>                                 | 220   |
| 18   | <i>Pseudomonas veronii</i>             | 1424   | 65   | <i>Bacillus asahii</i>                                     | 212   |
| 19   | <i>Bacillus thermoamylovorans</i>      | 1415   | 66   | <i>Arsenophonus endosymbiont of Dermacentor variabilis</i> | 209   |
| 20   | <i>Bacillus humi</i>                   | 1366   | 67   | <i>Staphylococcus epidermidis</i>                          | 198   |
| 21   | <i>Paenibacillus mucilaginosus</i>     | 1343   | 68   | <i>Thermobispora bispora</i>                               | 197   |
| 22   | <i>Nocardiopsis composita</i>          | 1317   | 69   | <i>Desulfosporosinus meridiei</i>                          | 180   |
| 23   | <i>Kocuria rhizophila</i>              | 1261   | 70   | <i>Pseudomonas citronellolis</i>                           | 174   |
| 24   | <i>Erwinia dispersa</i>                | 1133   | 71   | <i>Staphylococcus aureus</i>                               | 166   |
| 25   | <i>Bacillus endophyticus</i>           | 1010   | 72   | <i>Acinetobacter johnsonii</i>                             | 158   |
| 26   | <i>Candidatus Regiella insecticola</i> | 974    | 73   | <i>Microbacterium chokolatum</i>                           | 144   |
| 27   | <i>Pedomicrobium australicum</i>       | 965    | 74   | <i>Erwinia toletana</i>                                    | 140   |
| 28   | <i>Pseudomonas viridiflava</i>         | 902    | 75   | <i>Corynebacterium simulans</i>                            | 135   |
| 29   | <i>Paenibacillus larvae</i>            | 898    | 76   | <i>Hyphomicrobium zavarzinii</i>                           | 132   |
| 30   | <i>Bacillus oleronius</i>              | 880    | 77   | <i>Faecalibacterium prausnitzii</i>                        | 125   |
| 31   | <i>Bacillus foraminis</i>              | 851    | 78   | <i>Rothia dentocariosa</i>                                 | 121   |
| 32   | <i>Bacillus selenatarsenatis</i>       | 785    | 79   | <i>Pseudomonas balearica</i>                               | 117   |

|    |                                        |     |    |                                      |     |
|----|----------------------------------------|-----|----|--------------------------------------|-----|
| 33 | <i>Geobacillus thermodenitrificans</i> | 685 | 80 | <i>Rhodococcus fascians</i>          | 117 |
| 34 | <i>Brenneria quercina</i>              | 587 | 81 | <i>Virgibacillus marismortui</i>     | 114 |
| 35 | <i>Virgisporangium ochraceum</i>       | 519 | 82 | <i>Hyphomicrobium sulfonivorans</i>  | 102 |
| 36 | <i>Ammoniphilus oxalaticus</i>         | 516 | 83 | <i>Clostridium perfringens</i>       | 100 |
| 37 | <i>Bacillus clausii</i>                | 515 | 84 | <i>Sporosarcina ginsengi</i>         | 96  |
| 38 | <i>Paenibacillus macerans</i>          | 485 | 85 | <i>Brachybacterium conglomeratum</i> | 95  |
| 39 | <i>Propionibacterium acnes</i>         | 483 | 86 | <i>Bacillus ginsengihumi</i>         | 87  |
| 40 | <i>Sorangium cellulosum</i>            | 457 | 87 | <i>Brevibacillus laterosporus</i>    | 85  |
| 41 | <i>Paenibacillus lautus</i>            | 450 | 88 | <i>Microbispora rosea</i>            | 80  |
| 42 | <i>Corynebacterium durum</i>           | 449 | 89 | <i>Bacillus safensis</i>             | 80  |
| 43 | <i>Pseudomonas fragi</i>               | 432 | 90 | <i>Nocardiopsis exhalans</i>         | 79  |
| 44 | <i>Paenibacillus chitinolyticus</i>    | 430 | 91 | <i>Pseudomonas umsongensis</i>       | 78  |
| 45 | <i>Symbiobacterium thermophilum</i>    | 400 | 92 | <i>Planococcus maitriensis</i>       | 76  |
| 46 | <i>Brevibacillus reuszeri</i>          | 394 | 93 | <i>Rothia mucilaginosa</i>           | 74  |
| 47 | <i>Bacillus horikoshii</i>             | 392 | 94 | <i>Rhodobium orientis</i>            | 72  |

| Rank | Bacteria                              | Reads | Rank | Bacteria                               | Reads |
|------|---------------------------------------|-------|------|----------------------------------------|-------|
| 95   | <i>Rothia aeria</i>                   | 71    | 145  | <i>Arthrobacter psychrolactophilus</i> | 13    |
| 96   | <i>Paenibacillus illinoisensis</i>    | 66    | 146  | <i>Propionibacterium granulosum</i>    | 12    |
| 97   | <i>Bacillus farraginis</i>            | 65    | 147  | <i>Providencia stuartii</i>            | 11    |
| 98   | <i>Brevibacillus invocatus</i>        | 63    | 148  | <i>Gluconacetobacter liquefaciens</i>  | 11    |
| 99   | <i>Microbacterium maritypicum</i>     | 62    | 149  | <i>Virgibacillus halodenitrificans</i> | 11    |
| 100  | <i>Paenibacillus curdlandolyticus</i> | 60    | 150  | <i>Corynebacterium mastitidis</i>      | 11    |
| 101  | <i>Bacillus badius</i>                | 52    | 151  | <i>Virgibacillus pantothenticus</i>    | 10    |
| 102  | <i>Corynebacterium kroppenstedtii</i> | 45    | 152  | <i>Pseudonocardia halophobica</i>      | 10    |
| 103  | <i>[Ruminococcus] gnavus</i>          | 43    | 153  | <i>Brevundimonas diminuta</i>          | 10    |
| 104  | <i>Nonomuraea roseoviolacea</i>       | 38    | 154  | <i>Agrococcus jenensis</i>             | 10    |
| 105  | <i>Kocuria palustris</i>              | 38    | 155  | <i>Sporosarcina aquimarina</i>         | 9     |
| 106  | <i>Oceanobacillus oncorhynchi</i>     | 37    | 156  | <i>Mycobacterium llatzerense</i>       | 9     |
| 107  | <i>Corallocccus exiguus</i>           | 37    | 157  | <i>Mycobacterium arupense</i>          | 9     |
| 108  | <i>Bacillus trypoxylicola</i>         | 37    | 158  | <i>Clostridium hiranonis</i>           | 9     |
| 109  | <i>Virgibacillus picturae</i>         | 36    | 159  | <i>Staphylococcus haemolyticus</i>     | 8     |
| 110  | <i>Desulfotomaculum aeronauticum</i>  | 36    | 160  | <i>Sphingobacterium multivorum</i>     | 8     |
| 111  | <i>Rhodoplanes elegans</i>            | 33    | 161  | <i>Roseomonas mucosa</i>               | 8     |

|     |                                          |    |     |                                        |   |
|-----|------------------------------------------|----|-----|----------------------------------------|---|
| 112 | <i>Veillonella dispar</i>                | 32 | 162 | <i>Dorea formicigenerans</i>           | 8 |
| 113 | <i>Microbacterium lacticum</i>           | 32 | 163 | <i>Clostridium butyricum</i>           | 8 |
| 114 | <i>Bradyrhizobium elkanii</i>            | 32 | 164 | <i>Verrucospora giffhornensis</i>      | 7 |
| 115 | <i>Mycobacterium celatum</i>             | 31 | 165 | <i>Streptomyces reticuliscabiei</i>    | 7 |
| 116 | <i>Kurthia gibsonii</i>                  | 31 | 166 | <i>Ruminococcus bromii</i>             | 7 |
| 117 | <i>Bacillus fumarioli</i>                | 31 | 167 | <i>Blautia obeum</i>                   | 7 |
| 118 | <i>Paenibacillus edaphicus</i>           | 30 | 168 | <i>Alkaliphilus transvaalensis</i>     | 7 |
| 119 | <i>Brevibacterium paucivorans</i>        | 30 | 169 | <i>Actinokineospora diospyrosa</i>     | 7 |
| 120 | <i>Ruminococcus flavefaciens</i>         | 29 | 170 | <i>Staphylococcus equorum</i>          | 6 |
| 121 | <i>Rhodococcus ruber</i>                 | 29 | 171 | <i>Shinella granuli</i>                | 6 |
| 122 | <i>Corynebacterium stationis</i>         | 27 | 172 | <i>Salinispora tropica</i>             | 6 |
| 123 | <i>Corynebacterium variabile</i>         | 26 | 173 | <i>Saccharopolyspora hirsuta</i>       | 6 |
| 124 | <i>Acinetobacter rhizosphaerae</i>       | 25 | 174 | [ <i>Ruminococcus</i> ] <i>torques</i> | 6 |
| 125 | <i>Streptomyces lanatus</i>              | 25 | 175 | <i>Clostridium neonatale</i>           | 6 |
| 126 | <i>Stenotrophomonas geniculata</i>       | 22 | 176 | <i>Clavibacter michiganensis</i>       | 6 |
| 127 | <i>Acinetobacter lwoffii</i>             | 22 | 177 | <i>Candidatus Aquiluna rubra</i>       | 6 |
| 128 | <i>Brevibacillus thermoruber</i>         | 21 | 178 | <i>Brevibacterium aureum</i>           | 6 |
| 129 | <i>Acinetobacter schindleri</i>          | 20 | 179 | <i>Bosea</i> genosp.                   | 6 |
| 130 | <i>Mycobacterium vaccae</i>              | 20 | 180 | <i>Streptomyces radiopugnans</i>       | 5 |
| 131 | <i>Clostridium stercorearium</i>         | 20 | 181 | <i>Selenomonas noxia</i>               | 5 |
| 132 | <i>Blautia producta</i>                  | 20 | 182 | <i>Nocardia concava</i>                | 5 |
| 133 | <i>Candidatus Blochmannia floridanus</i> | 19 | 183 | <i>Citricoccus alkalitolerans</i>      | 5 |
| 134 | <i>Veillonella parvula</i>               | 18 | 184 | <i>Amycolatopsis thermoflava</i>       | 5 |
| 135 | <i>Streptomyces mirabilis</i>            | 18 | 185 | <i>Streptosporangium pseudovulgare</i> | 4 |
| 136 | <i>Streptomyces ahygroscopicus</i>       | 18 | 186 | <i>Streptomyces scabrisporus</i>       | 4 |
| 137 | <i>Clostridium thermopalmarium</i>       | 18 | 187 | <i>Sphingobacterium mizutaii</i>       | 4 |
| 138 | <i>Streptomyces rubrolavendulae</i>      | 17 | 188 | <i>Methylosinus sporium</i>            | 4 |
| 139 | <i>Clostridium bowmanii</i>              | 17 | 189 | <i>Methylobacterium adhaesivum</i>     | 4 |
| 140 | <i>Blastococcus aggregatus</i>           | 17 | 190 | <i>Methylibium petroleiphilum</i>      | 4 |
| 141 | <i>Nocardioides plantarum</i>            | 15 | 191 | <i>Clostridium acetobutylicum</i>      | 4 |
| 142 | <i>Janthinobacterium lividum</i>         | 15 | 192 | <i>Caulobacter henricii</i>            | 4 |
| 143 | <i>Thermoanaerobacter uzonensis</i>      | 14 | 193 | <i>Bdellovibrio bacteriovorus</i>      | 4 |
| 144 | <i>Acinetobacter guillouiae</i>          | 13 | 194 | <i>Agromyces mediolanus</i>            | 4 |

---

| Rank | Bacteria                                                | Reads | Rank | Bacteria                                                | Reads |
|------|---------------------------------------------------------|-------|------|---------------------------------------------------------|-------|
| 195  | <i>Acidovorax caeni</i>                                 | 4     | 245  | <i>Xanthobacter autotrophicus</i>                       | 1     |
| 196  | <i>Variovorax paradoxus</i>                             | 3     | 246  | <i>Williamsia serinedens</i>                            | 1     |
| 197  | <i>Thermoanaerobacterium saccharolyticum</i>            | 3     | 247  | <i>Streptococcus alactolyticus</i>                      | 1     |
| 198  | <i>Streptomyces aculeolatus</i>                         | 3     | 248  | <i>Staphylococcus succinus</i>                          | 1     |
| 199  | <i>Streptococcus anginosus</i>                          | 3     | 249  | <i>Staphylococcus pettenkoferi</i>                      | 1     |
| 200  | <i>Ruminococcus callidus</i>                            | 3     | 250  | <i>Sphingopyxis alaskensis</i>                          | 1     |
| 201  | <i>Roseateles depolymerans</i>                          | 3     | 251  | <i>Rhizobium leguminosarum</i>                          | 1     |
| 202  | <i>Pseudoclavibacter bifida</i>                         | 3     | 252  | <i>Pilimelia terevasa</i>                               | 1     |
| 203  | <i>Mycobacterium gordonae</i>                           | 3     | 253  | <i>Photobacterium angustum</i>                          | 1     |
| 204  | <i>Microbacterium barkeri</i>                           | 3     | 254  | <i>Paracoccus marcusii</i>                              | 1     |
| 205  | <i>Legionella pneumophila</i>                           | 3     | 255  | <i>Ochrobactrum intermedium</i>                         | 1     |
| 206  | <i>Geodermatophilus obscurus</i>                        | 3     | 256  | <i>Neisseria cinerea</i>                                | 1     |
| 207  | <i>Coprococcus eutactus</i>                             | 3     | 257  | <i>Microbacterium aurum</i>                             | 1     |
| 208  | <i>Burkholderia glathei</i>                             | 3     | 258  | <i>Macrococcus caseolyticus</i>                         | 1     |
| 209  | <i>Brevibacterium casei</i>                             | 3     | 259  | <i>Lactococcus garvieae</i>                             | 1     |
| 210  | <i>Acidovorax delafieldii</i>                           | 3     | 260  | <i>Lactobacillus ruminis</i>                            | 1     |
| 211  | <i>Rickettsia endosymbiont of Deronectes platynotus</i> | 3     | 261  | <i>Lactobacillus delbrueckii</i>                        | 1     |
| 212  | <i>Stenotrophomonas acidaminiphila</i>                  | 2     | 262  | <i>Haererehalobacter salaria</i>                        | 1     |
| 213  | <i>Sulfobacillus thermosulfidooxidans</i>               | 2     | 263  | <i>Couchioplanes caeruleus</i>                          | 1     |
| 214  | <i>Streptococcus luteciae</i>                           | 2     | 264  | <i>Corynebacterium pilosum</i>                          | 1     |
| 215  | <i>Sporomusa polytropa</i>                              | 2     | 265  | <i>Clostridium tetani</i>                               | 1     |
| 216  | <i>Sphingomonas wittichii</i>                           | 2     | 266  | <i>Burkholderia tuberum</i>                             | 1     |
| 217  | <i>Sphingomonas azotifigens</i>                         | 2     | 267  | <i>Burkholderia gladioli</i>                            | 1     |
| 218  | <i>Sphingobacterium faecium</i>                         | 2     | 268  | <i>Bacillus acidicola</i>                               | 1     |
| 219  | <i>Rubrivivax gelatinosus</i>                           | 2     | 269  | <i>Asticcacaulis biprosthecium</i>                      | 1     |
| 220  | <i>Psychrobacter celer</i>                              | 2     | 270  | <i>Anaerospora hongkongensis</i>                        | 1     |
| 221  | <i>Paracoccus aminovorans</i>                           | 2     | 271  | <i>Agrobacterium sullae</i>                             | 1     |
| 222  | <i>Methylobacterium mobilis</i>                         | 2     | 272  | <i>Aggregatibacter segnis</i>                           | 1     |
| 223  | <i>Methylobacterium organophilum</i>                    | 2     | 273  | <i>Actinoallomurus iriomotensis</i>                     | 1     |
| 224  | <i>Methylobacterium mesophilicum</i>                    | 2     | 274  | <i>Wolbachia endosymbiont of Dirofilaria immitis</i>    | 1     |
| 225  | <i>Methylobacterium komagatae</i>                       | 2     | 275  | <i>Wolbachia endosymbiont of Chorthippus parallelus</i> | 1     |
| 226  | <i>Methylobacterium hispanicum</i>                      | 2     |      |                                                         |       |
| 227  | <i>Lactobacillus zeae</i>                               | 2     |      |                                                         |       |
| 228  | <i>Jeotgalicoccus psychrophilus</i>                     | 2     |      |                                                         |       |

|     |                                             |   |
|-----|---------------------------------------------|---|
| 229 | <i>Inquilinus limosus</i>                   | 2 |
| 230 | <i>Enterococcus casseliflavus</i>           | 2 |
| 231 | <i>Cryobacterium psychrophilum</i>          | 2 |
| 232 | <i>Corynebacterium lubricantis</i>          | 2 |
| 233 | <i>Coprococcus catus</i>                    | 2 |
| 234 | <i>Clostridium subterminale</i>             | 2 |
| 235 | <i>Clostridium intestinale</i>              | 2 |
| 236 | <i>Cellulomonas xylanilytica</i>            | 2 |
| 237 | <i>Carnobacterium viridans</i>              | 2 |
| 238 | <i>Caldicellulosiruptor saccharolyticus</i> | 2 |
| 239 | <i>Burkholderia bryophila</i>               | 2 |
| 240 | <i>Azorhizobium doebereineriae</i>          | 2 |
| 241 | <i>Akkermansia muciniphila</i>              | 2 |
| 242 | <i>Agrobacterium vitis</i>                  | 2 |
| 243 | <i>Acinetobacter venetianus</i>             | 1 |
| 244 | <i>Xylanimicrobium pachnodae</i>            | 1 |

**Table S3.** Abundance of bacteria present in the mushroom colonized compost extract (MCCE) obtained by immersion of the compost for 24h.

| Rank | Bacteria                         | Reads  | Rank | Bacteria                                 | Reads |
|------|----------------------------------|--------|------|------------------------------------------|-------|
| 1    | <i>Serratia marcescens</i>       | 226018 | 48   | <i>Geobacillus thermodenitrificans</i>   | 33    |
| 2    | <i>Pseudomonas stutzeri</i>      | 22026  | 49   | <i>Bacillus selenatarsenatis</i>         | 32    |
| 3    | <i>Pseudomonas veronii</i>       | 15575  | 50   | <i>Sorangium cellulosum</i>              | 31    |
| 4    | <i>Pseudomonas viridiflava</i>   | 10383  | 51   | <i>Virgisporangium ochraceum</i>         | 30    |
| 5    | <i>Salmonella enterica</i>       | 7089   | 52   | <i>Paenibacillus larvae</i>              | 29    |
| 6    | <i>Plesiomonas shigelloides</i>  | 6252   | 53   | <i>Pedomicrobium australicum</i>         | 28    |
| 7    | <i>Pseudomonas fragi</i>         | 4769   | 54   | <i>Ammoniphilus oxalaticus</i>           | 28    |
| 8    | <i>Pseudomonas nitroreducens</i> | 4145   | 55   | <i>Symbiobacterium thermophilum</i>      | 25    |
| 9    | <i>Morganella morganii</i>       | 3500   | 56   | <i>Candidatus Blochmannia floridanus</i> | 25    |
| 10   | <i>Klebsiella oxytoca</i>        | 3418   | 57   | <i>Bacillus clausii</i>                  | 24    |
| 11   | <i>Erwinia soli</i>              | 2967   | 58   | <i>Stenotrophomonas retroflexus</i>      | 23    |
| 12   | <i>Trabulsiella farmeri</i>      | 2853   | 59   | <i>Nocardiopsis composta</i>             | 22    |
| 13   | <i>Pseudomonas alcaligenes</i>   | 2818   | 60   | <i>Paenibacillus macerans</i>            | 20    |

|    |                                                            |      |    |                                       |    |
|----|------------------------------------------------------------|------|----|---------------------------------------|----|
| 14 | <i>Erwinia dispersa</i>                                    | 1249 | 61 | <i>Paenibacillus chondroitinus</i>    | 20 |
| 15 | <i>Pseudomonas balearica</i>                               | 1088 | 62 | <i>Bacillus horikoshii</i>            | 19 |
| 16 | <i>Pseudomonas umsongensis</i>                             | 825  | 63 | <i>Bacillus coagulans</i>             | 19 |
| 17 | <i>Brenneria quercina</i>                                  | 788  | 64 | <i>Paenibacillus alvei</i>            | 18 |
| 18 | <i>Candidatus Regiella insecticola</i>                     | 787  | 65 | <i>Staphylococcus sciuri</i>          | 18 |
| 19 | <i>Pseudomonas citronellolis</i>                           | 633  | 66 | <i>Brevibacillus reuszeri</i>         | 17 |
| 20 | <i>Acinetobacter johnsonii</i>                             | 539  | 67 | <i>Paenibacillus chitinolyticus</i>   | 16 |
| 21 | <i>Enterobacter cowanii</i>                                | 509  | 68 | <i>Geobacillus vulcani</i>            | 16 |
| 22 | <i>Bacillus flexus</i>                                     | 473  | 69 | <i>Bacillus cohnii</i>                | 16 |
| 23 | <i>Stenotrophomonas geniculata</i>                         | 441  | 70 | <i>Providencia stuartii</i>           | 16 |
| 24 | <i>Photorhabdus temperata</i>                              | 336  | 71 | <i>Gluconacetobacter liquefaciens</i> | 16 |
| 25 | <i>Serratia symbiotica</i>                                 | 319  | 72 | <i>Bacillus longiquaesitum</i>        | 14 |
| 26 | <i>Arsenophonus endosymbiont of Dermacentor variabilis</i> | 264  | 73 | <i>Paenibacillus stellifer</i>        | 14 |
| 27 | <i>Erwinia toletana</i>                                    | 172  | 74 | <i>Corynebacterium durum</i>          | 13 |
| 28 | <i>Acinetobacter rhizosphaerae</i>                         | 140  | 75 | <i>Bacillus marisflavi</i>            | 13 |
| 29 | <i>Bacillus firmus</i>                                     | 137  | 76 | <i>Micrococcus luteus</i>             | 12 |
| 30 | <i>Paenibacillus amylolyticus</i>                          | 126  | 77 | <i>Aneurinibacillus migulanus</i>     | 12 |
| 31 | <i>Bacillus muralis</i>                                    | 99   | 78 | <i>Bacillus asahii</i>                | 12 |
| 32 | <i>Anoxybacillus kestanbolensis</i>                        | 91   | 79 | <i>Thermobispora bispora</i>          | 12 |
| 33 | <i>Lysinibacillus boronitolerans</i>                       | 87   | 80 | <i>Propionibacterium acnes</i>        | 11 |
| 34 | <i>Bacillus halodurans</i>                                 | 85   | 81 | <i>Paenibacillus lautus</i>           | 11 |
| 35 | <i>Bacillus humi</i>                                       | 80   | 82 | <i>Rothia dentocariosa</i>            | 10 |
| 36 | <i>Bacillus thermoamylovorans</i>                          | 79   | 83 | <i>Desulfosporosinus meridiei</i>     | 8  |
| 37 | <i>Actinomadura vinacea</i>                                | 72   | 84 | <i>Staphylococcus epidermidis</i>     | 7  |
| 38 | <i>Acinetobacter lwoffii</i>                               | 68   | 85 | <i>Staphylococcus aureus</i>          | 7  |
| 39 | <i>Bacillus oleronius</i>                                  | 67   | 86 | <i>Microbacterium chokolatum</i>      | 7  |
| 40 | <i>Paenibacillus lentimorbus</i>                           | 65   | 87 | <i>Corynebacterium simulans</i>       | 7  |
| 41 | <i>Bacillus endophyticus</i>                               | 63   | 88 | <i>Clostridium perfringens</i>        | 7  |
| 42 | <i>Paenibacillus mucilaginosus</i>                         | 58   | 89 | <i>Paenibacillus barengoltzii</i>     | 6  |
| 43 | <i>Stenotrophomonas acidaminiphila</i>                     | 52   | 90 | <i>Faecalibacterium prausnitzii</i>   | 6  |
| 44 | <i>Acinetobacter schindleri</i>                            | 47   | 91 | <i>Bacillus ginsengihumi</i>          | 6  |
| 45 | <i>Bacillus foraminis</i>                                  | 46   | 92 | <i>Rhodococcus fascians</i>           | 5  |
| 46 | <i>Acinetobacter guillouiae</i>                            | 40   | 93 | <i>Virgibacillus marismortui</i>      | 5  |
| 47 | <i>Kocuria rhizophila</i>                                  | 33   | 94 | <i>Bacillus farraginis</i>            | 5  |



| Rank | Bacteria                              | Reads | Rank | Bacteria                               | Reads |
|------|---------------------------------------|-------|------|----------------------------------------|-------|
| 95   | <i>Acinetobacter venetianus</i>       | 5     | 142  | <i>Virgibacillus pantothenicus</i>     | 1     |
| 96   | <i>Sporosarcina ginsengi</i>          | 4     | 143  | <i>Mycobacterium arupense</i>          | 1     |
| 97   | <i>Brevibacillus laterosporus</i>     | 4     | 144  | <i>Clostridium hiranonis</i>           | 1     |
| 98   | <i>Microbispora rosea</i>             | 4     | 145  | <i>Staphylococcus haemolyticus</i>     | 145   |
| 99   | <i>Bacillus safensis</i>              | 4     | 146  | <i>Roseomonas mucosa</i>               | 146   |
| 100  | <i>Rothia mucilaginosa</i>            | 4     | 147  | <i>Clostridium butyricum</i>           | 147   |
| 101  | <i>Paenibacillus curdolanolyticus</i> | 4     | 148  | <i>Ruminococcus bromii</i>             | 148   |
| 102  | <i>Veillonella dispar</i>             | 4     | 149  | <i>Alkaliphilus transvaalensis</i>     | 149   |
| 103  | <i>Erwinia oleae</i>                  | 4     | 150  | <i>Streptomyces radiopugnans</i>       | 150   |
| 104  | <i>Enterococcus sulfureus</i>         | 4     | 151  | <i>Selenomonas noxia</i>               | 151   |
| 105  | <i>Planococcus maitriensis</i>        | 3     | 152  | <i>Nocardia concava</i>                | 152   |
| 106  | <i>Rhodobium orientis</i>             | 3     | 153  | <i>Streptosporangium pseudovulgare</i> | 153   |
| 107  | <i>Brevibacillus invocatus</i>        | 3     | 154  | <i>Streptomyces scabrisporus</i>       | 154   |
| 108  | <i>Microbacterium maritypicum</i>     | 3     | 155  | <i>Clostridium acetobutylicum</i>      | 155   |
| 109  | <i>Oceanobacillus oncorhynchi</i>     | 3     | 156  | <i>Legionella pneumophila</i>          | 156   |
| 110  | <i>Kurthia gibsonii</i>               | 3     | 157  | <i>Acidovorax delafieldii</i>          | 157   |
| 111  | <i>Bacillus fumarioli</i>             | 3     | 158  | <i>Sporomusa polytropia</i>            | 158   |
| 112  | <i>Ruminococcus flavefaciens</i>      | 3     | 159  | <i>Shewanella pacifica</i>             | 159   |
| 113  | <i>Hyphomicrobium zavarzinii</i>      | 2     | 160  | <i>Selenomonas ruminantium</i>         | 160   |
| 114  | <i>Hyphomicrobium sulfonivorans</i>   | 2     | 161  | <i>Psychrobacter pulmonis</i>          | 161   |
| 115  | <i>Rothia aeria</i>                   | 2     | 162  | <i>Nannocystis exedens</i>             | 162   |
| 116  | <i>Kocuria palustris</i>              | 2     | 163  | <i>Halomonas nitritophilus</i>         | 163   |
| 117  | <i>Virgibacillus picturae</i>         | 2     | 164  | <i>Haemophilus parainfluenzae</i>      | 164   |
| 118  | <i>Desulfotomaculum aeronauticum</i>  | 2     | 165  | <i>Enterococcus cecorum</i>            | 165   |
| 119  | <i>Corynebacterium stationis</i>      | 2     | 166  | <i>Allochromatium vinosum</i>          | 166   |
| 120  | <i>Clostridium bowmanii</i>           | 2     |      |                                        |       |
| 121  | <i>Microbacterium barkeri</i>         | 2     |      |                                        |       |
| 122  | <i>Pseudoxanthomonas mexicana</i>     | 2     |      |                                        |       |
| 123  | <i>Clostridium subterminale</i>       | 2     |      |                                        |       |
| 124  | <i>Brachybacterium conglomeratum</i>  | 1     |      |                                        |       |
| 125  | <i>Nocardiosis exhalans</i>           | 1     |      |                                        |       |
| 126  | <i>Bacillus badius</i>                | 1     |      |                                        |       |
| 127  | <i>Corynebacterium kroppenstedtii</i> | 1     |      |                                        |       |
| 128  | [ <i>Ruminococcus</i> ] <i>gnavus</i> | 1     |      |                                        |       |

|     |                                        |   |
|-----|----------------------------------------|---|
| 129 | <i>Corallococcus exiguus</i>           | 1 |
| 130 | <i>Rhodoplanes elegans</i>             | 1 |
| 131 | <i>Brevibacterium paucivorans</i>      | 1 |
| 132 | <i>Corynebacterium variabile</i>       | 1 |
| 133 | <i>Brevibacillus thermoruber</i>       | 1 |
| 134 | <i>Mycobacterium vaccae</i>            | 1 |
| 135 | <i>Clostridium stercorarium</i>        | 1 |
| 136 | <i>Blautia producta</i>                | 1 |
| 137 | <i>Veillonella parvula</i>             | 1 |
| 138 | <i>Clostridium thermopalmarium</i>     | 1 |
| 139 | <i>Blastococcus aggregatus</i>         | 1 |
| 140 | <i>Janthinobacterium lividum</i>       | 1 |
| 141 | <i>Virgibacillus halodenitrificans</i> | 1 |

**Table S4.** Agronomic traits of *A. subrufescens* mushrooms.

| Application date | Semi-controlled Conditions |      |      |                           |      |      |               |      |      |                     |    |     |                         |      |      |
|------------------|----------------------------|------|------|---------------------------|------|------|---------------|------|------|---------------------|----|-----|-------------------------|------|------|
|                  | Yield (%)                  |      |      | Biological Efficiency (%) |      |      | Precocity (%) |      |      | Number of Mushrooms |    |     | Weight of Mushrooms (g) |      |      |
|                  | Control                    | 1h   | 24h  | Control                   | 1h   | 24h  | Control       | 1h   | 24h  | Control             | 1h | 24h | Control                 | 1h   | 24h  |
| 3 <sup>rd</sup>  | 12.6                       | 6.4  | 18.5 | 18.6                      | 9.4  | 27.2 | 42.4          | 15.2 | 36.9 | 15                  | 9  | 18  | 23.6                    | 19.8 | 28.7 |
|                  | 12.9                       | 17.3 | 14.4 | 19.0                      | 25.4 | 21.2 | 82.3          | 73.1 | 75.4 | 12                  | 21 | 13  | 30.2                    | 23.0 | 31.0 |
|                  | 10.1                       | 12.4 | 16.3 | 14.8                      | 18.2 | 23.9 | 12.1          | 36.9 | 61.3 | 13                  | 15 | 21  | 21.7                    | 23.1 | 21.7 |
|                  | 18.7                       | 12.4 | 19.9 | 27.5                      | 18.2 | 29.2 | 56.6          | 51.9 | 38.0 | 19                  | 19 | 22  | 27.5                    | 18.3 | 25.3 |
| 6 <sup>th</sup>  | 12.6                       | 12.8 | 13.8 | 18.6                      | 18.8 | 20.3 | 42.4          | 40.2 | 29.5 | 15                  | 13 | 18  | 23.6                    | 27.5 | 21.5 |
|                  | 12.9                       | 19.1 | 19.3 | 19.0                      | 28.2 | 28.3 | 82.3          | 56.3 | 64.2 | 12                  | 29 | 23  | 30.2                    | 18.5 | 23.4 |
|                  | 10.1                       | 12.4 | 15.9 | 14.8                      | 18.2 | 23.3 | 12.1          | 39.9 | 68.0 | 13                  | 17 | 17  | 21.7                    | 20.4 | 26.1 |
|                  | 18.7                       | 13.1 | 20.4 | 27.5                      | 19.3 | 30.0 | 56.6          | 14.1 | 63.8 | 19                  | 15 | 35  | 27.5                    | 24.5 | 16.3 |
| 9 <sup>th</sup>  | 12.6                       | 10.6 | 13.3 | 18.6                      | 15.6 | 19.6 | 42.4          | 45.5 | 66.2 | 15                  | 15 | 18  | 23.6                    | 19.8 | 20.7 |
|                  | 12.9                       | 17.7 | 17.3 | 19.0                      | 26.0 | 25.5 | 82.3          | 38.0 | 52.6 | 12                  | 21 | 30  | 30.2                    | 23.6 | 16.2 |

|                  |      |      |      |      |      |      |      |      |       |    |    |    |      |      |      |
|------------------|------|------|------|------|------|------|------|------|-------|----|----|----|------|------|------|
|                  | 10.1 | 16.5 | 11.6 | 14.8 | 24.2 | 17.0 | 12.1 | 49.5 | 34.3  | 13 | 20 | 20 | 21.7 | 23.1 | 16.2 |
|                  | 18.7 | 16.7 | 17.9 | 18.7 | 24.6 | 26.4 | 56.6 | 63.0 | 34.9  | 19 | 17 | 27 | 27.5 | 27.5 | 18.6 |
| 12 <sup>th</sup> | 12.6 | 21.4 | 21.9 | 18.6 | 31.5 | 32.3 | 42.4 | 65.7 | 69.2  | 15 | 30 | 34 | 23.6 | 20.0 | 18.1 |
|                  | 12.9 | 13.5 | 21.7 | 19.0 | 19.9 | 31.9 | 82.3 | 61.1 | 57.1  | 12 | 16 | 31 | 30.2 | 23.6 | 19.6 |
|                  | 10.1 | 14.2 | 16.4 | 14.8 | 20.9 | 24.2 | 12.1 | 29.2 | 63.5  | 13 | 14 | 22 | 21.7 | 28.4 | 20.9 |
|                  | 18.7 | 18.8 | 20.1 | 27.5 | 27.7 | 29.6 | 56.6 | 37.2 | 66.5  | 19 | 27 | 34 | 27.5 | 19.5 | 16.6 |
|                  | 12.6 | 14.2 | 11.8 | 18.6 | 20.9 | 17.3 | 42.4 | 19.4 | 23.7  | 15 | 21 | 13 | 23.6 | 18.9 | 25.3 |
| 15 <sup>th</sup> | 12.9 | 4.4  | 19.7 | 19.0 | 6.5  | 29.0 | 82.3 | 0.0  | 55.1  | 12 | 8  | 33 | 30.2 | 15.5 | 16.7 |
|                  | 10.1 | 19.0 | 7.0  | 14.8 | 27.9 | 10.3 | 12.1 | 59.8 | 100.0 | 13 | 24 | 8  | 21.7 | 22.2 | 24.5 |
|                  | 18.7 | 16.5 | 18.0 | 27.5 | 24.2 | 26.5 | 56.6 | 68.6 | 52.5  | 19 | 16 | 23 | 27.5 | 28.8 | 22.0 |

**Table S5.** Mean values and standard deviation of agronomic traits of *A. subrufescens* mushrooms from the 3<sup>rd</sup> application until the 15<sup>th</sup> (see Table S2).

|         | Yield (%) |    | Precocity (%) |    | Number of Mushrooms |    | Weight of Mushrooms (g) |    |
|---------|-----------|----|---------------|----|---------------------|----|-------------------------|----|
|         | Mean      | SD | Mean          | SD | Mean                | SD | Mean                    | SD |
| Control | 14        | 4  | 48            | 29 | 15                  | 3  | 15                      | 3  |
| 1h      | 14        | 4  | 43            | 20 | 18                  | 6  | 22                      | 4  |
| 24h     | 17        | 4  | 56            | 18 | 23                  | 8  | 21                      | 4  |

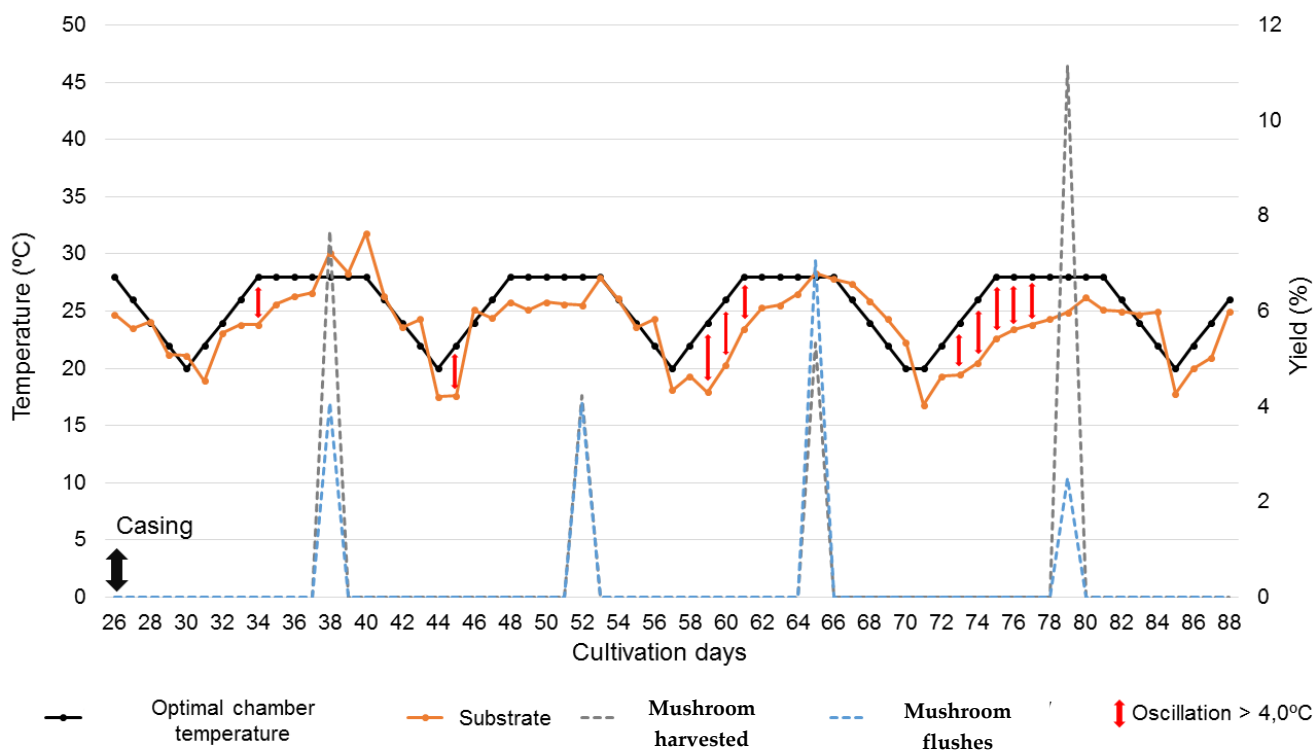

**Figure S1.** Chamber and compost temperature, mushroom harvested and mushroom flushes, and oscillation temperature during crop period.
